# Supplementary material for: Two cyclic hexapeptides from Penicillium sp. FN070315 with antiangiogenic activities
Source: PubMed Central journal article supplement (PMC5614539; doi:10.1371/journal.pone.0184339), 2017-09-26
Supplement: pone.0184339.s009.pdf [file pone.0184339.s009.pdf]

### Physico-chemical properties of compound 1 and 2

PF1171A (**1**): white solid;  $[\alpha]_{589}^{25} +31^\circ$  (c 0.15, MeOH);  $^1\text{H-NMR}$  (500 MHz,  $\text{CDCl}_3$ )  $\delta$ : 0.87 (3H, d,  $J = 6.0$  Hz, Leu- $\delta$ ), 0.90 (3H, d,  $J = 7.2$  Hz, *allo*-Ile- $\gamma$ ), 0.91 (3H, t,  $J = 7.2$  Hz, *allo*-Ile- $\delta$ ), 0.94 (3H, d,  $J = 5.2$  Hz, Leu- $\delta'$ ), 0.95, (3H, d,  $J = 7.2$  Hz, MeLeu- $\delta'$ ), 0.97 (3H, d,  $J = 6.8$  Hz, MeLeu- $\delta$ ), 1.27 (3H, d,  $J = 6.8$  Hz, Ala- $\beta$ ), 1.38 (2H, m, *allo*-Ile- $\gamma'$ ), 1.53 (1H, m, Leu- $\gamma$ ), 1.57 (2H, m, Pip- $\gamma$ ), 1.63 (1H, m, MeLeu- $\gamma$ ), 1.76 (2H, m, Leu- $\beta$ , Pip- $\beta$ ), 1.91 (1H, m, MeLeu- $\beta$ ), 1.98 (1H, m, Leu- $\beta$ ), 2.04 (3H, m, Pip- $\beta$ , Pip- $\delta$ ), 2.18 (1H, m, MeLeu- $\beta$ ), 2.41 (1H, m, *allo*-Ile- $\beta$ ), 3.14 (1H, d,  $J = 3.0$  Hz, Pip- $\epsilon$ ), 3.17 (3H, s, MeLeu-*N*-Me), 3.47 (1H, m, MeLeu- $\alpha$ ), 3.67 (1H, dd,  $J = 3.0, 11.5$  Hz, Pip- $\alpha$ ), 4.12 (1H, d,  $J = 13.5$  Hz, Pip- $\epsilon$ ), 4.43 (1H, dd,  $J = 3.0, 7.5$  Hz, *allo*-Ile- $\alpha$ ), 4.53 (1H, m, Leu- $\alpha$ ), 4.80 (1H, m, Ala- $\alpha$ ), 7.11 (1H, t,  $J = 7.5$  Hz ABA-3), 7.18 (1H, d,  $J = 7.5$  Hz, ABA-5), 7.39 (1H, d,  $J = 7.5$  Hz, ABA-2), 7.46 (1H, t,  $J = 13.5$  Hz, ABA-4), 7.62 (1H, d,  $J = 9.5$  Hz, Ala-NH), 7.99 (1H, d,  $J = 8.0$  Hz, Leu-NH), 8.30 (1H, d,  $J = 8.5$  Hz, *allo*-Ile-NH), 9.43(1H, s, ABA-NH).  $^{13}\text{C-NMR}$  (125 MHz,  $\text{CDCl}_3$ )  $\delta$ : 11.9 (*allo*-Ile- $\delta$ ), 14.0 (*allo*-Ile- $\gamma$ ), 18.5 (Ala- $\beta$ ), 21.8 (Leu- $\delta$ ), 22.1 (MeLeu- $\delta$ ), 23.2 (Leu- $\delta'$ ), 23.4 (MeLeu- $\delta'$ ), 24.5 (Leu- $\gamma$ , Pip- $\beta$ ), 25.6 (MeLeu- $\gamma$ ), 26.9 (*allo*-Ile- $\gamma'$ ), 27.4 (Pip- $\gamma$ ), 28.1 (Pip- $\delta$ ), 36.3 (Leu- $\beta$ ), 36.5 (*allo*-Ile- $\alpha$ ), 37.8 (MeLeu- $\beta$ ), 37.9 (MeLeu-*N*-Me), 47.9 (Ala- $\alpha$ ), 50.9 (Leu- $\alpha$ ), 52.7 (Pip- $\epsilon$ ), 57.3 (*allo*-Ile- $\alpha$ ), 61.6 (Pip- $\alpha$ ), 65.2 (MeLeu- $\alpha$ ), 122.7 (ABA-1), 123.3 (ABA-3), 123.9 (ABA-2), 127.2 (ABA-5), 131.8 (ABA-4), 137.2 (ABA-6), 168.9 (Pip-CO), 169.3 (MeLeu-CO), 170.3 (ABA-CO), 171.1 (*allo*-Ile-CO), 174.1 (Leu-CO), 174.4 (Ala-CO).

PF1171C (**2**): white solid;  $[\alpha]_{589}^{25} +26^\circ$  (c 0.15, MeOH);  $^1\text{H-NMR}$  (500 MHz,  $\text{CDCl}_3$ )  $\delta$ : 0.87 (3H, d,  $J = 6.0$  Hz, Leu- $\delta$ ), 0.93 (3H, d,  $J = 7.2$  Hz, Val- $\gamma$ ), 0.96 (6H, d,  $J = 6.8$  Hz, I6.8 Hz, MeLeu- $\delta'$ , Leu- $\delta$ ), 0.97 (3H, d,  $J = 6.8$  Hz, MeLeu- $\delta$ ), 1.05, (3H, d,  $J = 7.2$  Hz, Val- $\gamma'$ ), 1.28 (3H, d,  $J = 6.8$  Hz, Ala- $\beta$ ), 1.54 (3H, m, Leu- $\gamma$ , Pip- $\delta$ ), 1.63 (1H, m, MeLeu- $\gamma$ ), 1.74 (1H, m, Pip- $\beta$ ), 1.76 (1H, m, Leu- $\beta$ ), 1.91 (1H, m, MeLeu- $\beta$ ), 2.00 (1H, m, Leu- $\beta$ ), 2.04 (1H, m, Pip- $\beta$ ), 2.08 (2H, m, Pip- $\gamma$ ), 2.17 (1H, m, MeLeu- $\beta$ ), 2.67 (1H, m, Val- $\beta$ ), 3.14 (1H, d,  $J = 3.0$  Hz Pip- $\epsilon$ ), 3.18 (3H, s, MeLeu-*N*-Me), 3.47 (1H, dd,  $J = 5.0, 9.0$  Hz, MeLeu- $\alpha$ ), 3.67 (1H, dd,  $J = 3.0, 11.5$  Hz, Pip- $\alpha$ ), 4.12 (1H, d,  $J = 13.5$  Hz, Pip- $\epsilon$ ), 4.30 (1H, dd,  $J = 3.0, 7.5$  Hz, Val- $\alpha$ ), 4.55 (1H, m, Leu- $\alpha$ ), 4.80 (1H, m, Ala- $\alpha$ ), 7.11 (1H, t,  $J = 7.5$  Hz ABA-3), 7.18 (1H, d,  $J = 7.5$  Hz, ABA-5), 7.45 (1H, t,  $J = 13.5$  Hz, ABA-4), 7.62 (1H, d,  $J = 9.5$  Hz, Ala-NH), 7.99 (1H, d,  $J = 8.0$  Hz, Leu-NH), 8.28 (1H, d,  $J = 8.0$  Hz, Val-NH), 9.39(1H, s, ABA-NH).  $^{13}\text{C-NMR}$  (125 MHz,  $\text{CDCl}_3$ )  $\delta$ : 16.2 (Val- $\gamma$ ), 18.4 (Ala- $\beta$ ), 19.8 (Ala- $\gamma'$ ), 21.8 (Leu- $\delta$ ), 22.1 (MeLeu- $\delta$ )

23.2 (Leu- $\delta'$ ), 23.3 (MeLeu- $\delta'$ ), 24.4 (Leu- $\gamma$ ), 24.5 (Pip- $\beta$ ), 25.6 (MeLeu- $\gamma$ ), 27.4 (Pip- $\delta$ ), 28.2 (Pip- $\gamma$ ), 29.9 (Val- $\delta$ ) 36.3 (Leu- $\beta$ ), 37.8 (MeLeu- $\beta$ ), 37.9 (MeLeu-*N*-Me), 47.9 (Ala-  $\alpha$ ), 50.9 (Leu-  $\alpha$ ), 52.7 (Pip- $\epsilon$ ), 59.2 (Val- $\alpha$ ), 61.6 (Pip- $\alpha$ ), 65.2 (MeLeu- $\alpha$ ), 122.8 (ABA-1), 123.3 (ABA-3), 123.9 (ABA-2), 127.2 (ABA-5), 131.8 (ABA-4), 137.2 (ABA-6), 168.9 (Pip-CO), 169.3 (MeLeu-CO), 170.2 (ABA-CO), 170.7 (Val-CO), 174.2 (Leu-CO), 174.4 (Ala-CO).
